# Supplementary material for: The Peru Urban versus Rural Asthma (PURA) Study: methods and baseline quality control data from a cross-sectional investigation into the prevalence, severity, genetics, immunology and environmental factors affecting asthma in adolescence in Peru
Source: HighWire-hosted journal article supplement (doi:10.1136/bmjopen-2011-000421), 2012-01-01
Supplement: bmjopen-2011-000421-s1.pdf [file bmjopen-2011-000421-s1.pdf]

## DESCRIPTION OF ADDITIONAL DATA FILES

Supplement S1. English-translated questionnaire. Questionnaire was administered in Spanish. Symptom questions derived originally from validated Spanish questionnaire by International Study of Asthma and Allergies in Childhood (ISAAC). Additional questions written in Spanish with assistance of local nurses, health promoters, and physicians and then back-translated into English.

Supplement S2. English-translated spirometry field instrument. Instrument originally written in Spanish and back-translated. Smoking questions included here to conserve privacy of participant during questionnaire. Note the quality control scale used at the end of each spirometry session, pre- and post-salbutamol.

Supplement S3. English-translated allergy field instrument. Instrument originally written in Spanish and back-translated.

Supplement S4. English-translated MIE-PM measurement field instrument. Instrument originally written in Spanish and back-translated. New methods employed for measuring ventilation data: size of room, number of doors and window, and state of doors and windows at placement and retrieval. Participants were also asked about type and time of combustible use in the 48 hours of measurement.

Supplement S5. Sample allergen grading algorithm Uses cockroach as example. All those with  $\geq$  Grade 1 considered positive, since in algorithm Grade 1 implies notably larger reaction than negative control, which is always assigned Grade 0. All 5 other algorithms identical. Abbreviations for understanding shorthand in algorithm. Guide to interpretation

begins with paragraph explaining principles of algorithm and follows with verbatim interpretation instructions from manufacturer. Then algorithm in visual form follows.
