# Supplementary material for: The Peru Urban versus Rural Asthma (PURA) Study: methods and baseline quality control data from a cross-sectional investigation into the prevalence, severity, genetics, immunology and environmental factors affecting asthma in adolescence in Peru
Source: HighWire-hosted journal article supplement (doi:10.1136/bmjopen-2011-000421), 2012-01-01
Supplement: bmjopen-2011-000421-s2.pdf [file bmjopen-2011-000421-s2.pdf]

STROBE Statement—Checklist of items that should be included in reports of *cross-sectional studies*

|                           | <b>Item No</b> | <b>Recommendation</b>                                                             |
|---------------------------|----------------|-----------------------------------------------------------------------------------|
| <b>Title and abstract</b> | 1              | (a) Completed<br>(b) Completed                                                    |
| <b>Introduction</b>       |                |                                                                                   |
| Background/rationale      | 2              | Completed                                                                         |
| Objectives                | 3              | Completed                                                                         |
| <b>Methods</b>            |                |                                                                                   |
| Study design              | 4              | Completed                                                                         |
| Setting                   | 5              | Completed                                                                         |
| Participants              | 6              | (a) Completed                                                                     |
| Variables                 | 7              | Completed                                                                         |
| Data sources/ measurement | 8*             | Completed                                                                         |
| Bias                      | 9              | Completed                                                                         |
| Study size                | 10             | Completed                                                                         |
| Quantitative variables    | 11             | Completed                                                                         |
| Statistical methods       | 12             | (a) Completed<br>(b) Completed<br>(c) Completed<br>(d) Completed<br>(e) Completed |
| <b>Results</b>            |                |                                                                                   |
| Participants              | 13*            | (a) Completed<br>(b) Completed<br>(c) Completed                                   |
| Descriptive data          | 14*            | (a) Completed<br>(b) Completed                                                    |
| Outcome data              | 15*            | Completed                                                                         |
| Main results              | 16             | (a) Completed<br>(b) Completed<br>(c) Completed                                   |
| Other analyses            | 17             | Completed                                                                         |
| <b>Discussion</b>         |                |                                                                                   |
| Key results               | 18             | Completed                                                                         |
| Limitations               | 19             | Completed                                                                         |
| Interpretation            | 20             | Completed                                                                         |
| Generalisability          | 21             | Completed                                                                         |
| <b>Other information</b>  |                |                                                                                   |
| Funding                   | 22             | Completed                                                                         |

\*Give information separately for exposed and unexposed groups.

**Note:** An Explanation and Elaboration article discusses each checklist item and gives methodological background and published examples of transparent reporting. The STROBE checklist is best used in conjunction with this article (freely available on the Web sites of PLoS Medicine at <http://www.plosmedicine.org/>, Annals of Internal Medicine at <http://www.annals.org/>, and Epidemiology at <http://www.epidem.com/>). Information on the STROBE Initiative is available at [www.strobe-statement.org](http://www.strobe-statement.org).
